# Supplementary material for: Alterations of the expression of TET2 and DNA 5-hmC predict poor prognosis in Myelodysplastic Neoplasms
Source: Springer Nature journal article supplement (doi:10.1186/s12885-023-11449-2), 2023-10-26
Supplement: MOESM1 [file 26227450]

1 **Figure Legends (Supplementary figures)**

2 Supplementary Figure 1: a. Age distribution of the study subjects was similar across the  
3 groups (Mann-Whitney U-test) b. More than 75% of patients were younger than 60 years  
4 when individual MDS patients were sorted in the increasing order of their age. c. Age  
5 distribution across IPSS-R subcategories was similar (Kruskal-Wallis test). d. Age distribution  
6 did not vary across MDS subtypes (Kruskal-Wallis test)

7

8 Supplementary Figure 2: Immunohistochemistry for 5-hmC in the study subjects' bone  
9 marrow biopsy FFPE sections. The left panels (a, c, e, and g) show magnification at 10X  
10 objective, and the right panels (b, d, f, and h) at 40X objective. 5-hmC positive cells show  
11 brown staining. The samples are arranged IPSS-R low risk on top (a and b), followed by  
12 intermediate risk (c and d), high risk (e and f), and very high risk (g and h). The percentage of  
13 nuclear positivity for 5-hmC in these samples is 10%, 5-10%, < 5%, and < 5%, respectively.  
14 Additional IHC images showing 5-hmC in the controls, IPSSR-Low, IPSSR-Intermediate, IPSSR-  
15 High and AML-MRC samples.

16

17

18 Supplementary Figure 3: Deleterious effects of *TET2* p.H1778R on catalytic activity: a. *TET2*  
19 variant (c.A5333G:p.H1778R) from an IPSS-R intermediate risk patient visualized in  
20 Integrative Genomics Viewer showing the frequency of the pathogenic variant across all the  
21 reads b. The percentage of 5-hmC of the same patient is shown using a star. c. *TET2* expression  
22 in the same patient is shown using a star. d. Immunohistochemistry for 5-hmC in the patient's  
23 bone marrow biopsy FFPE sections showed < 5% nuclear positivity. e. Immunohistochemistry  
24 for *TET2* in the patient's bone marrow biopsy FFPE sections showed 30-35% nuclear positivity.  
25 The magnification in Figures d and e are at 40X objective.

26

**a**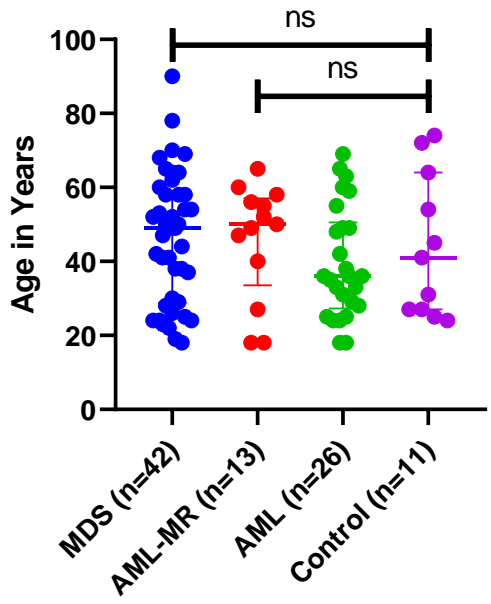**b**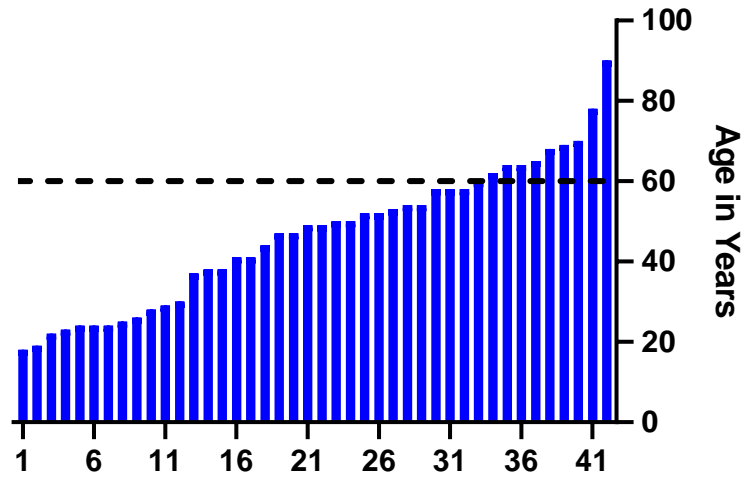**c**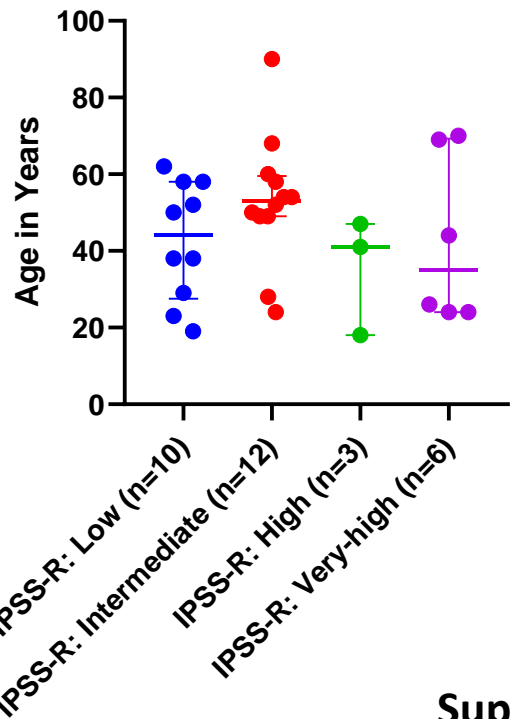**d**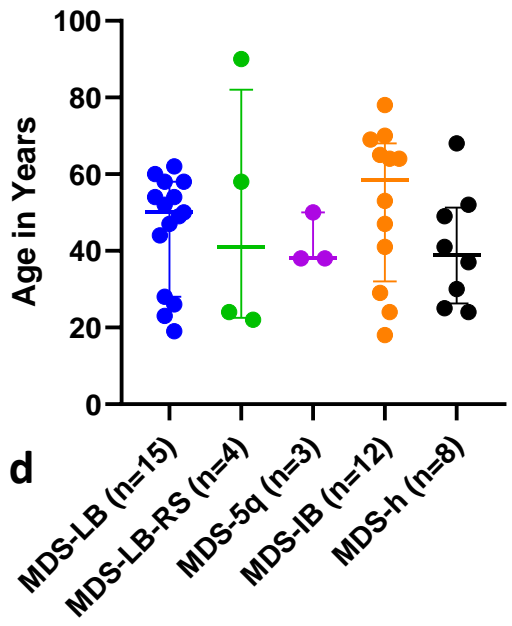

**Supplementary Figure 1**

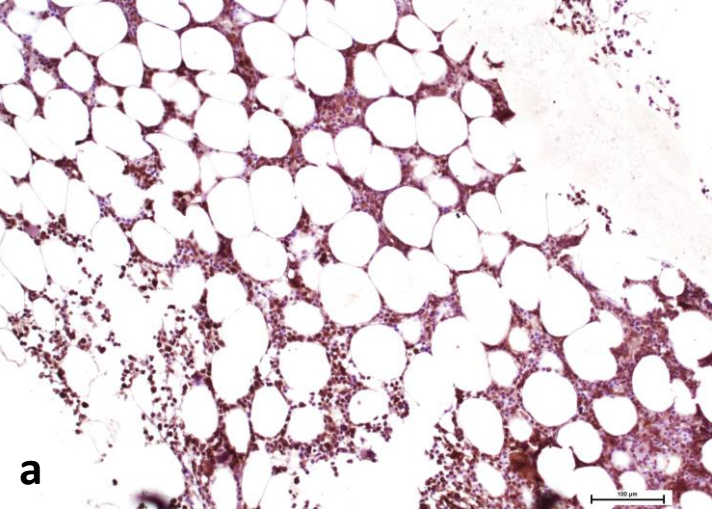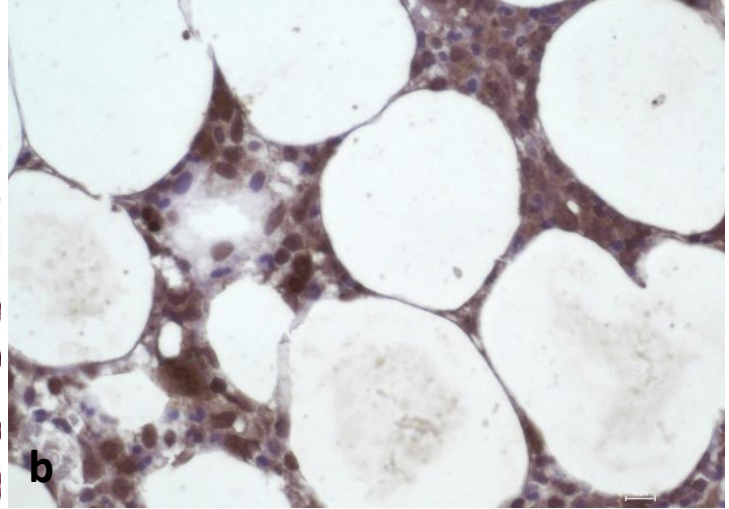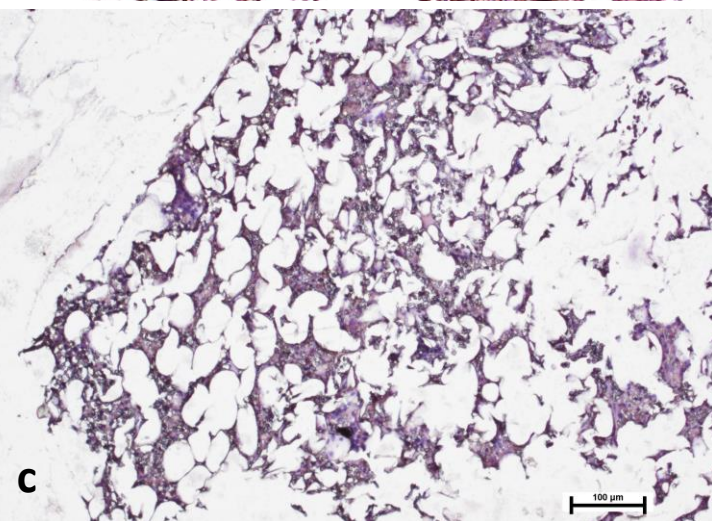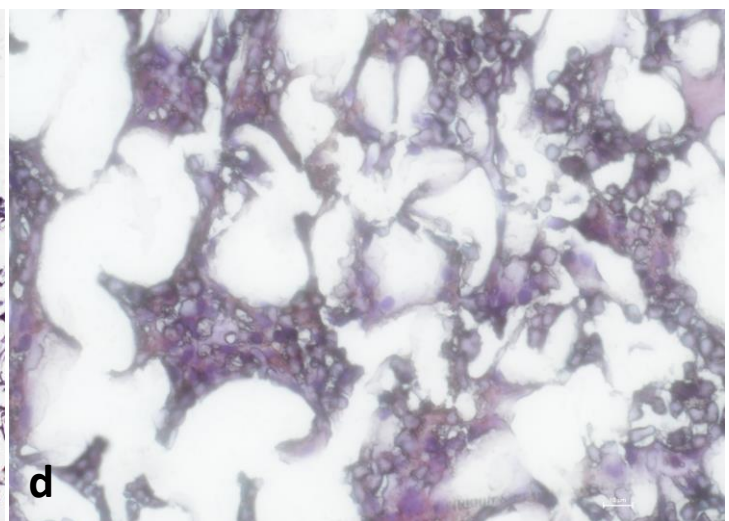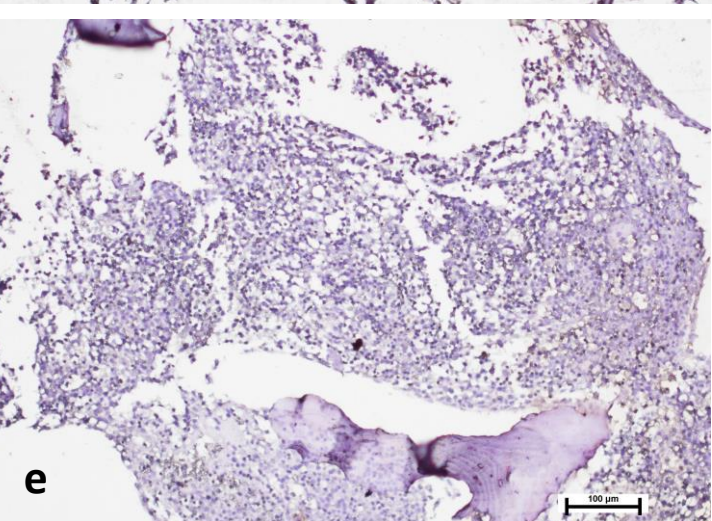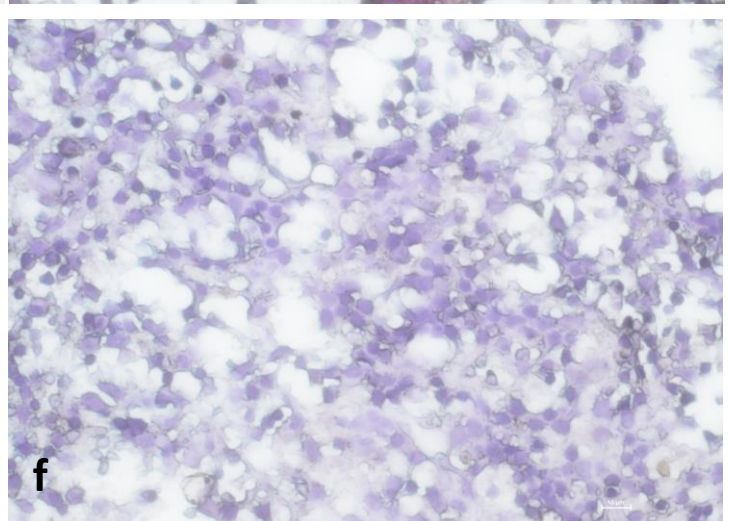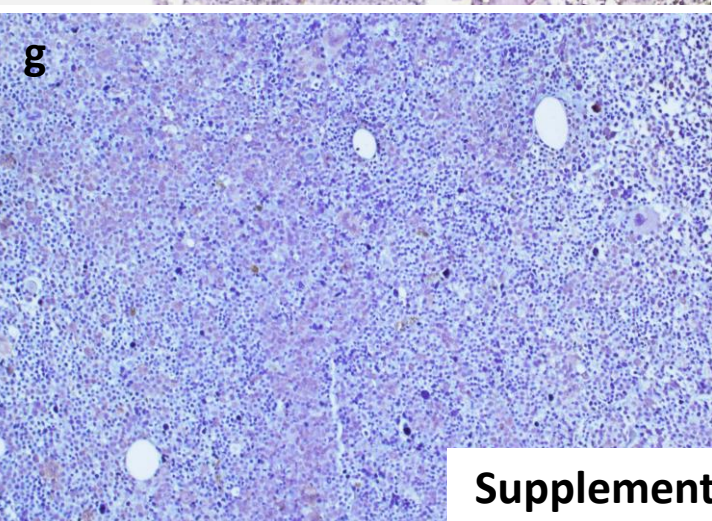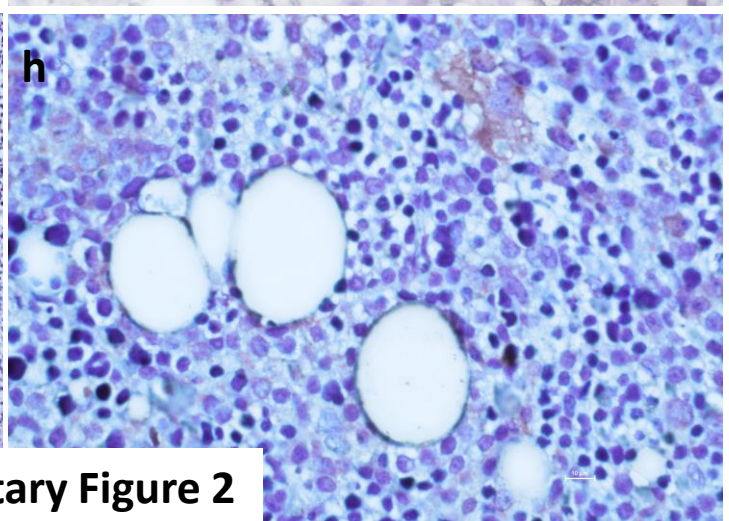

**Supplementary Figure 2**

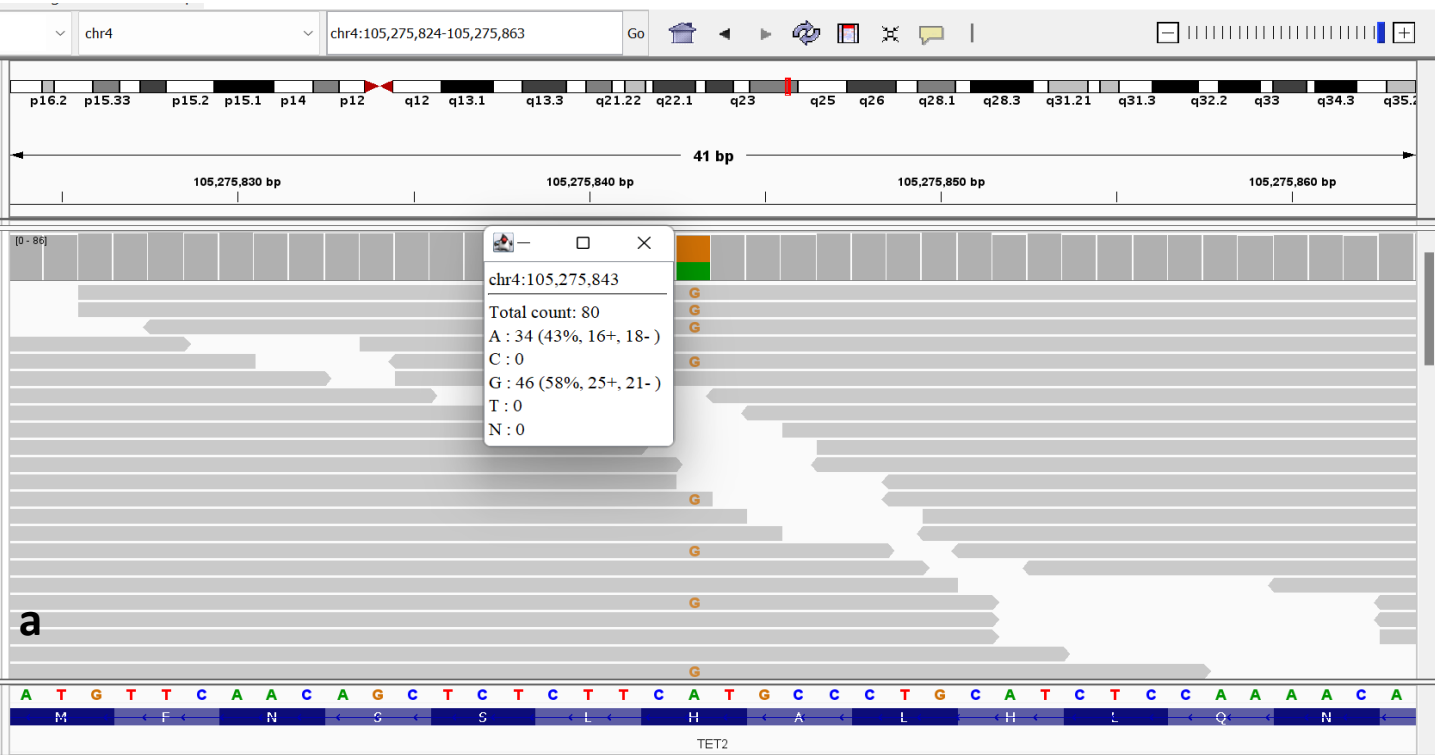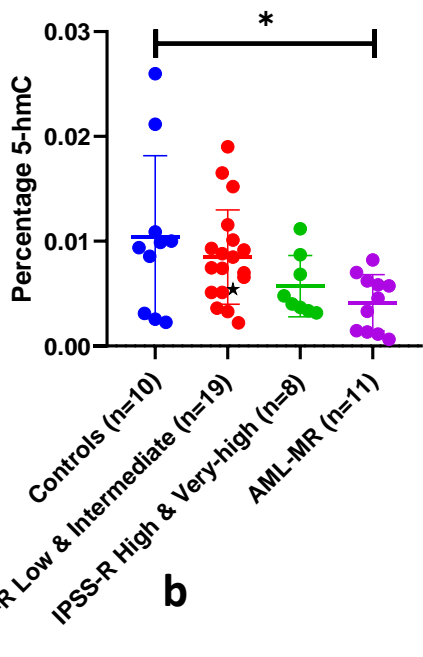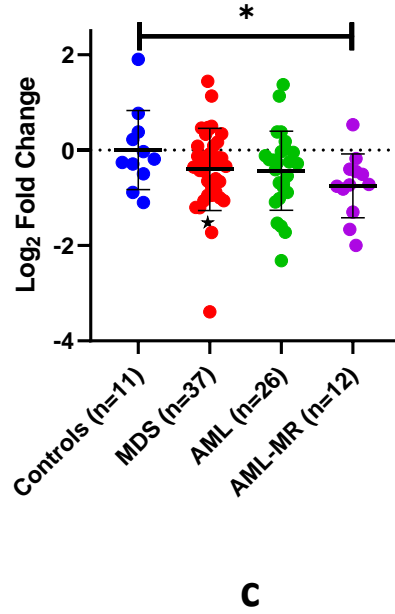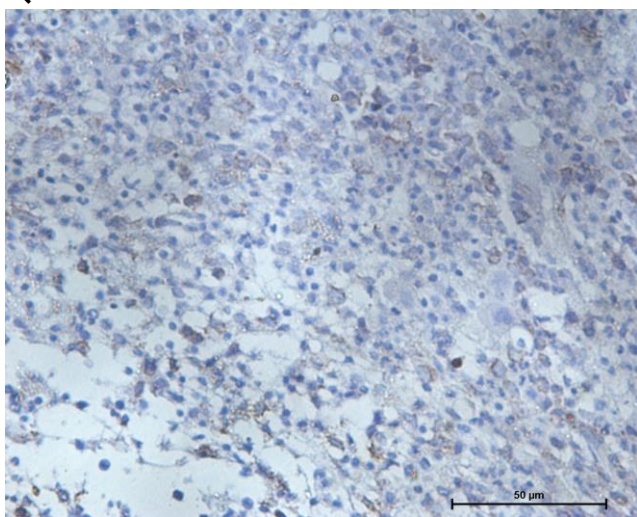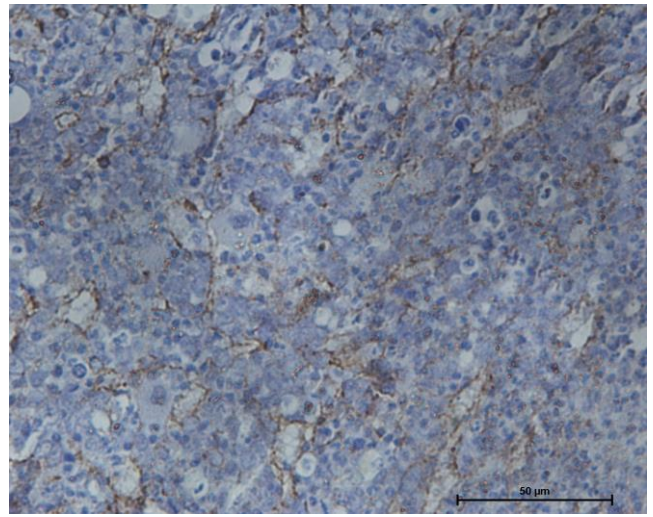

**d** **e**  
 Supplementary Figure 3

**Control**

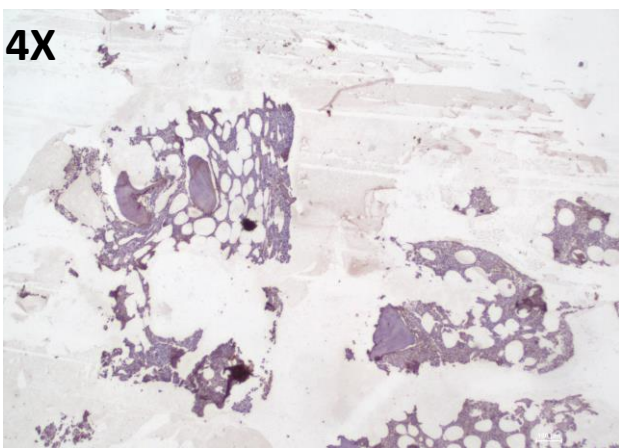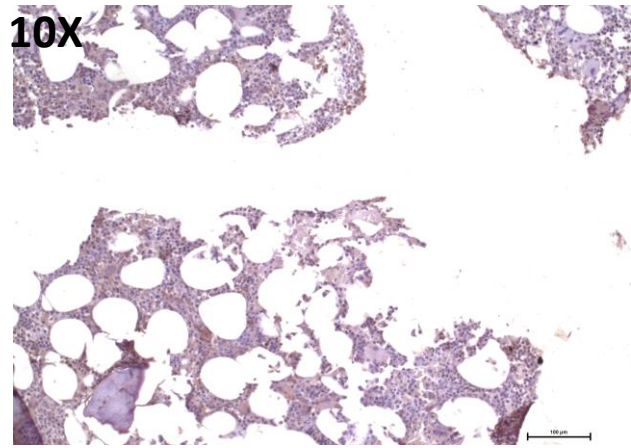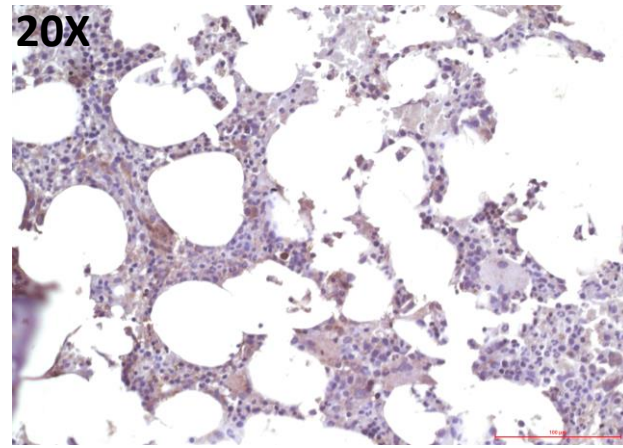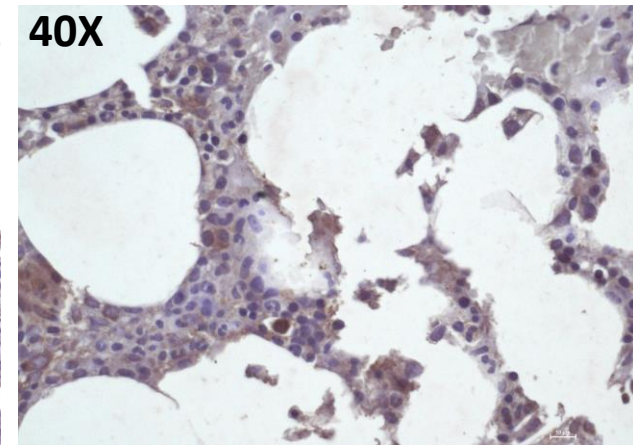

**Control**

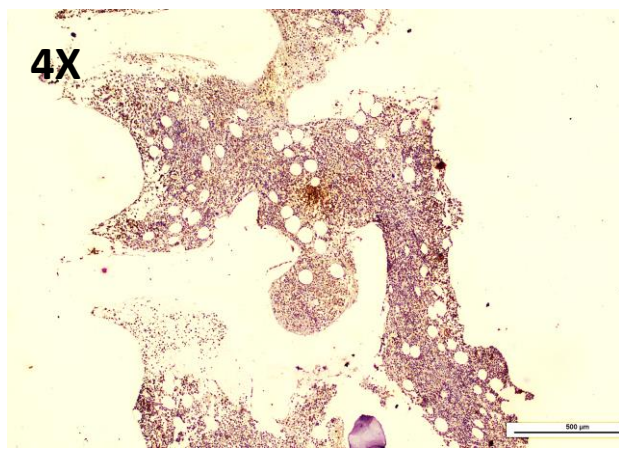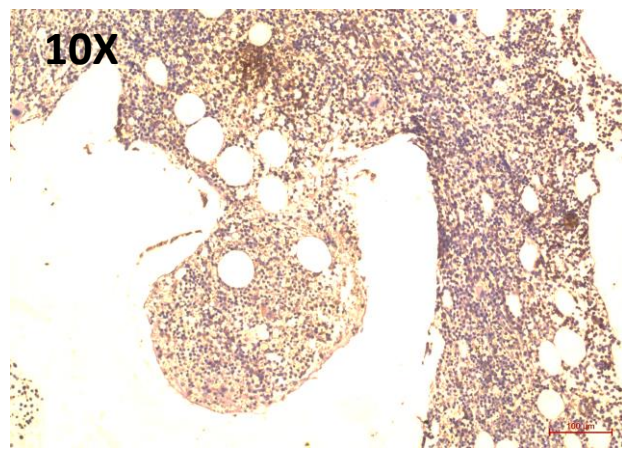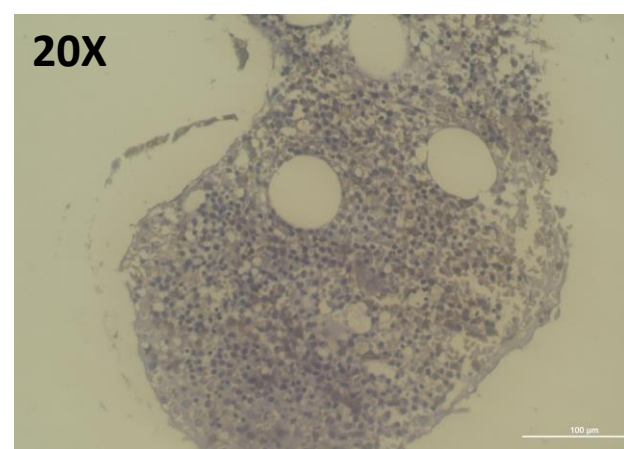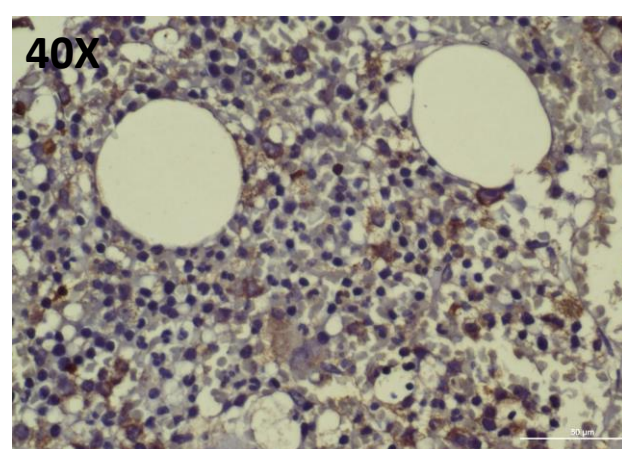

# Control

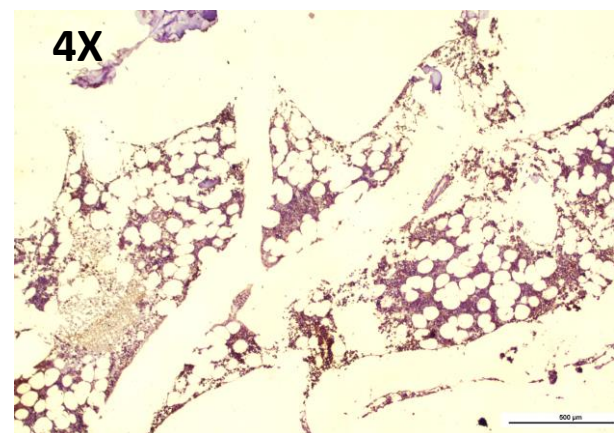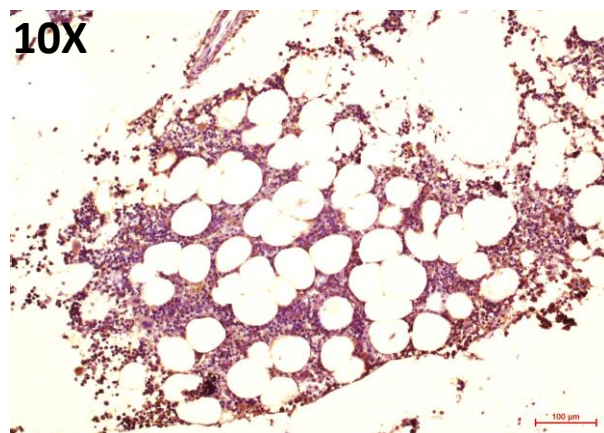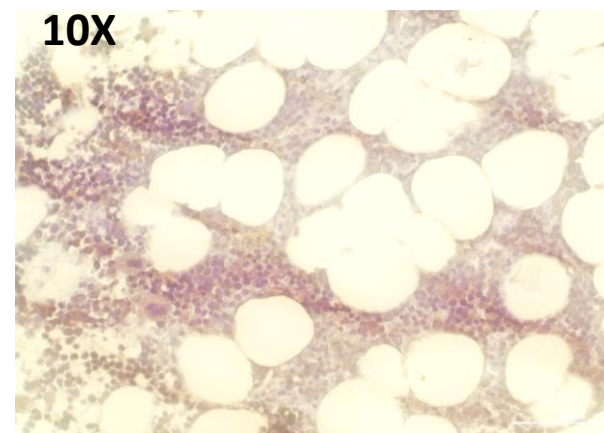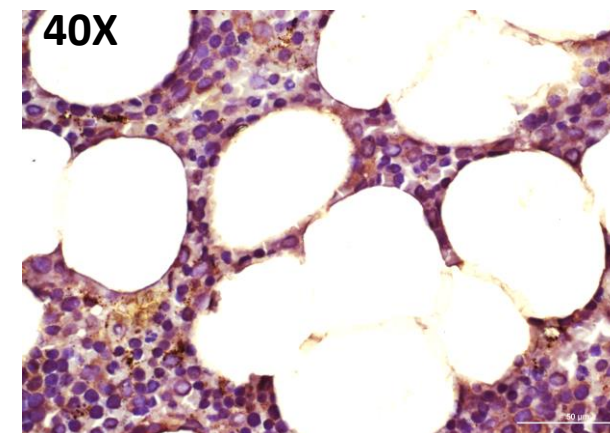

# Control

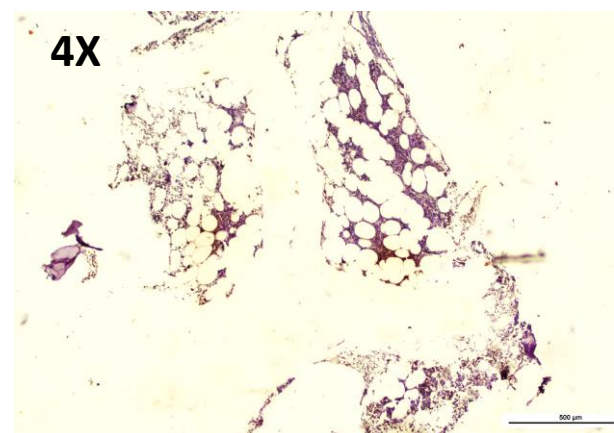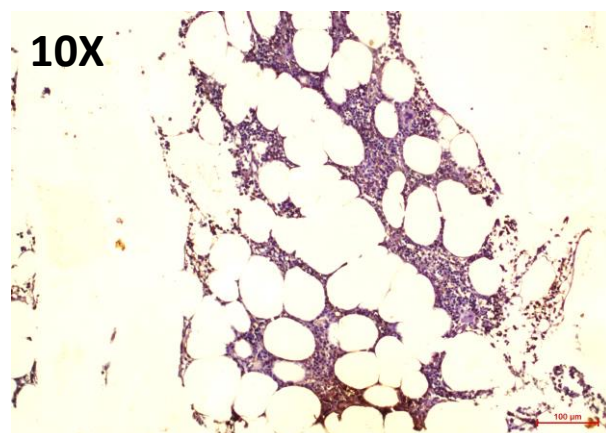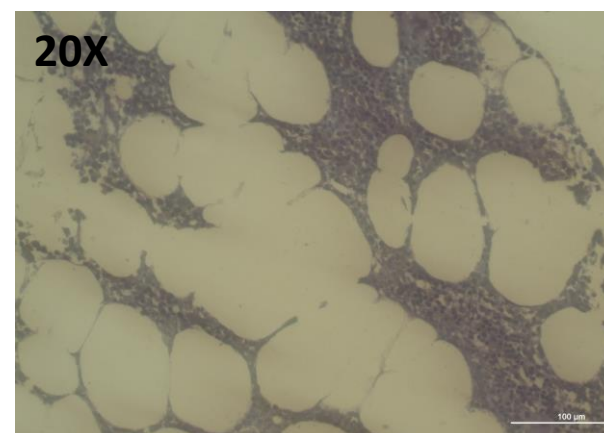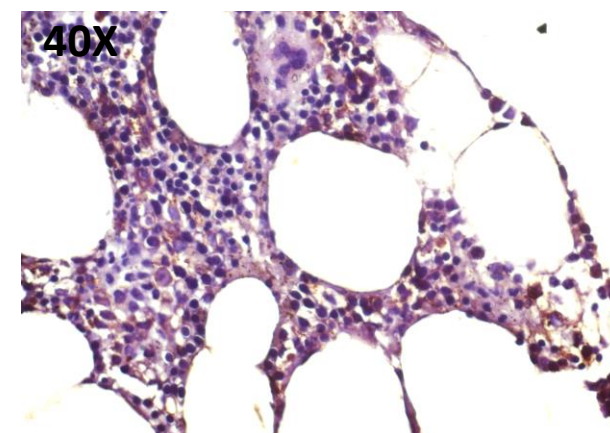

# Control

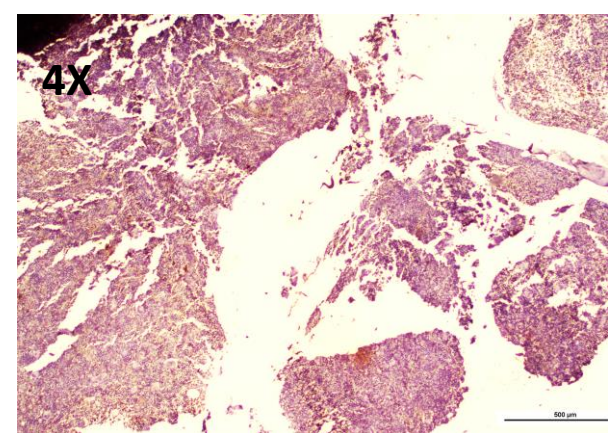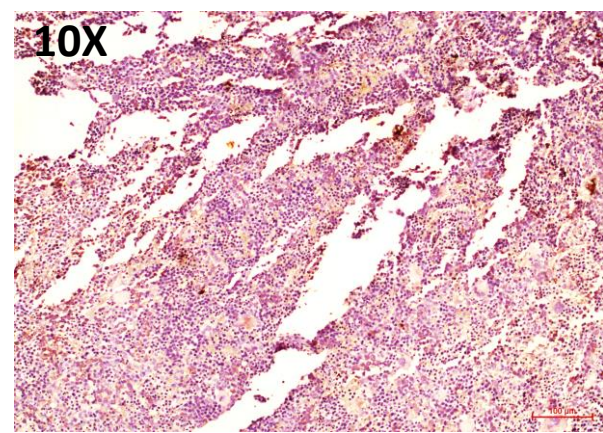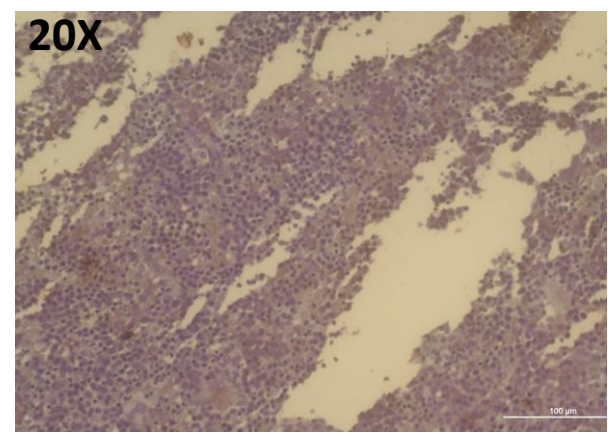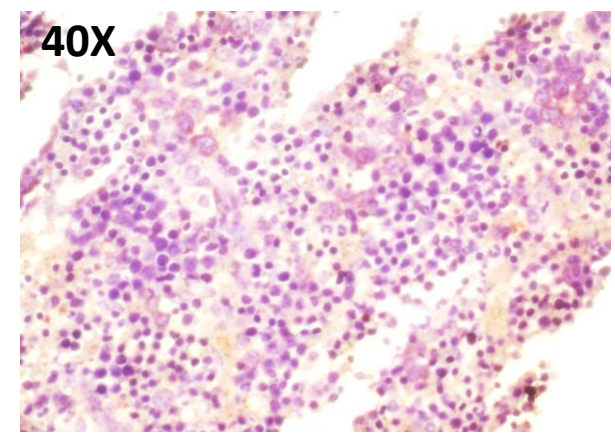

**IPSS-R Low**

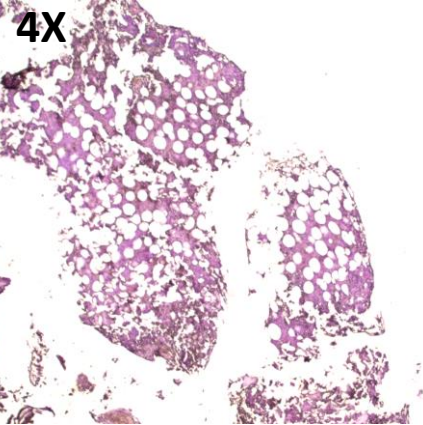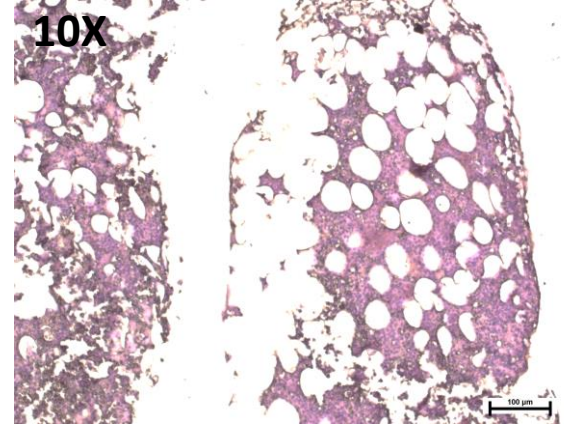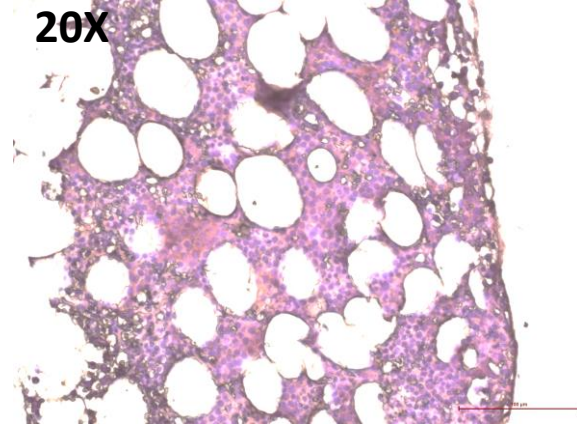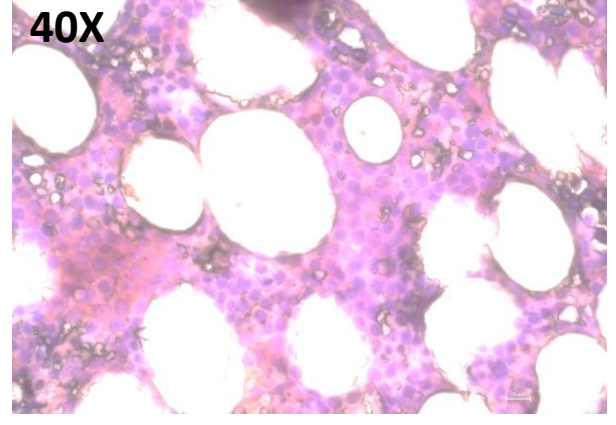

**IPSS-R Low**

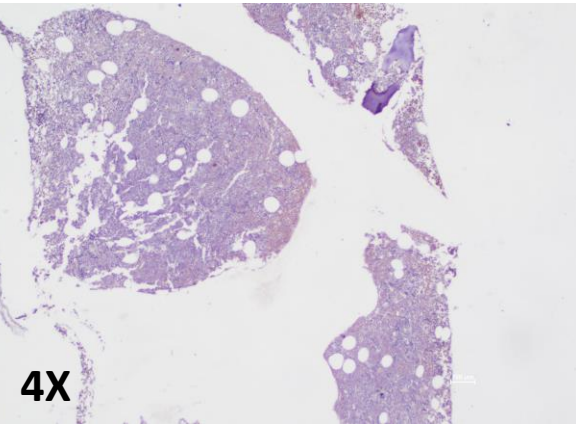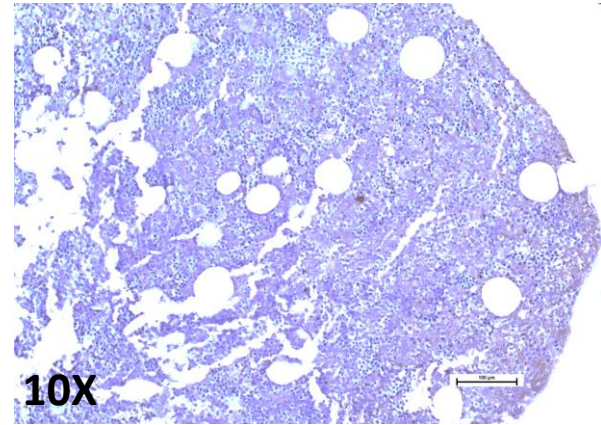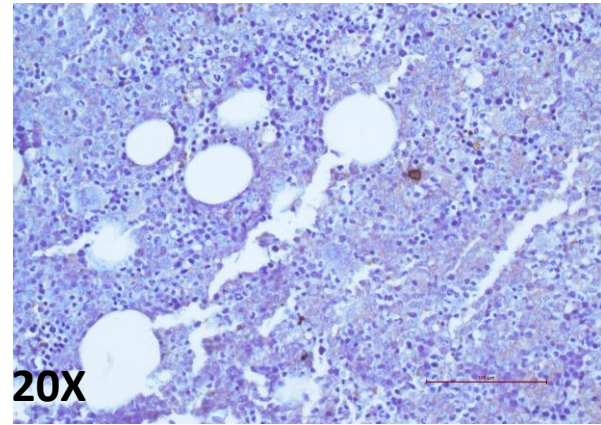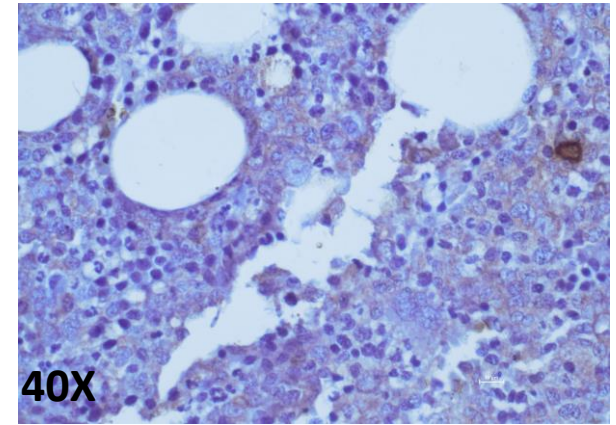



# IPSS-R Low

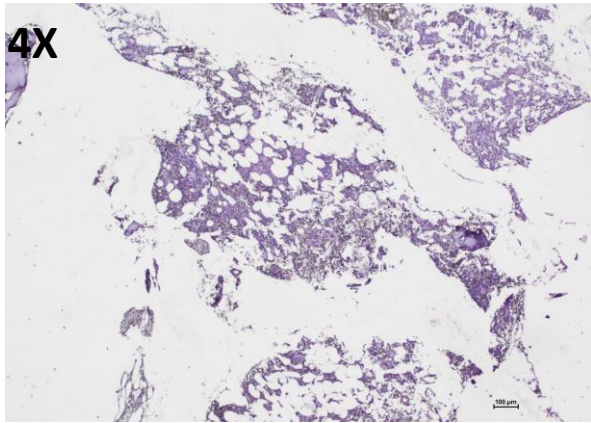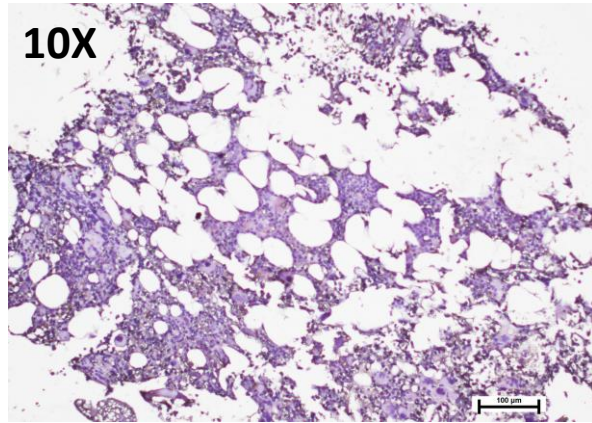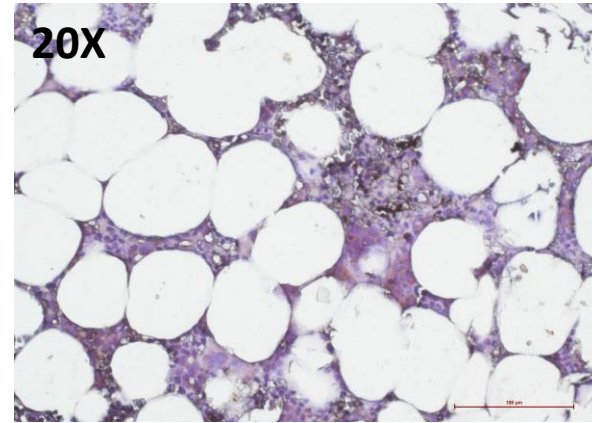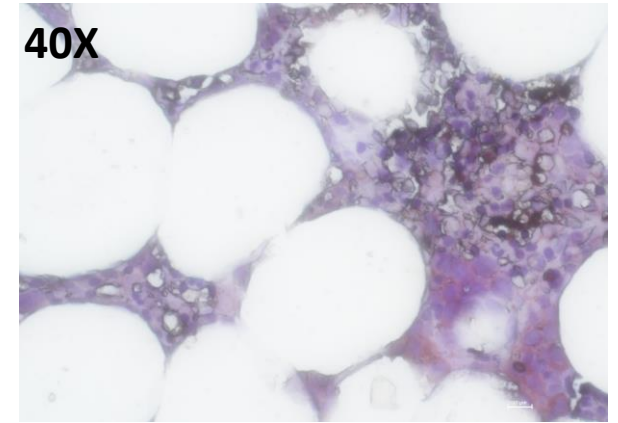

# IPSS-R Intermediate

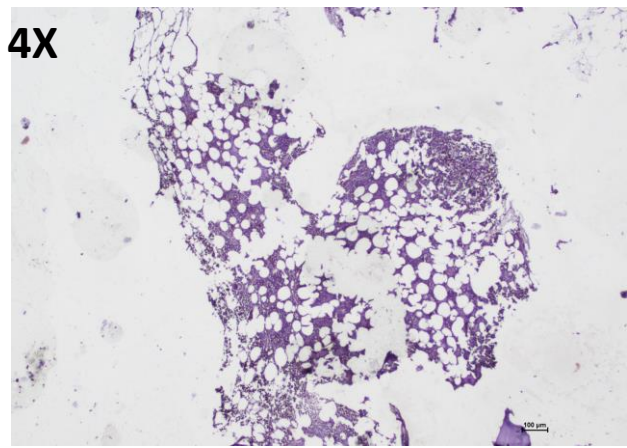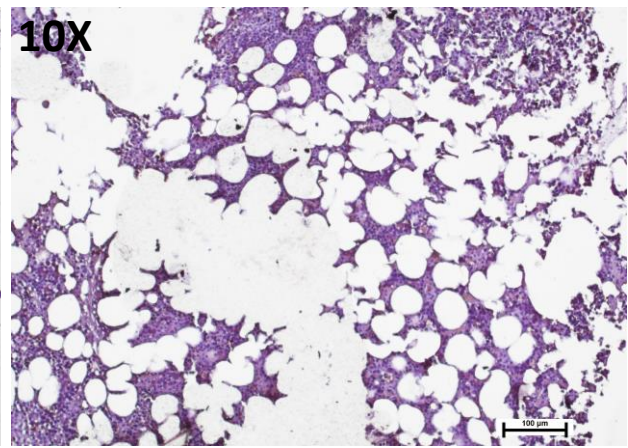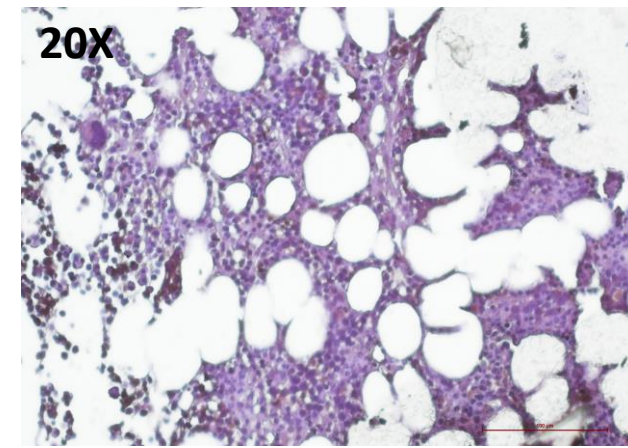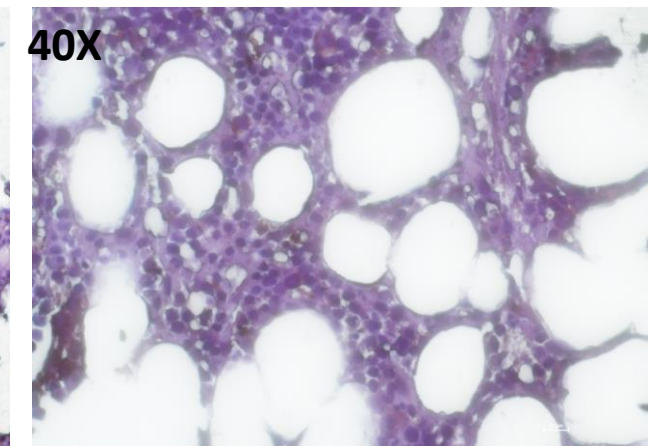

# IPSS-R Intermediate

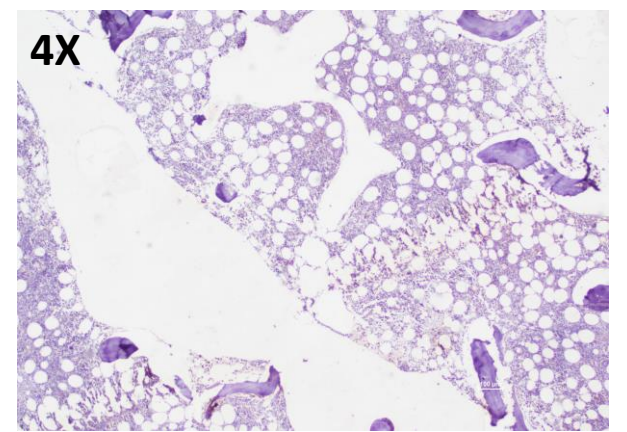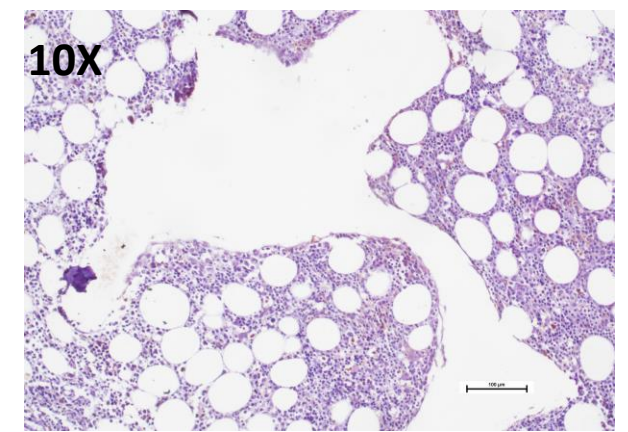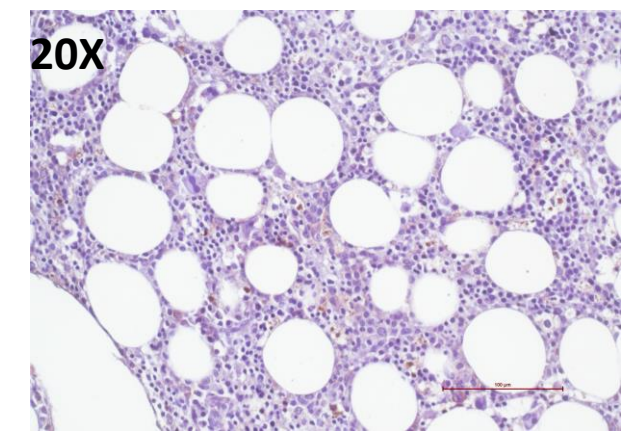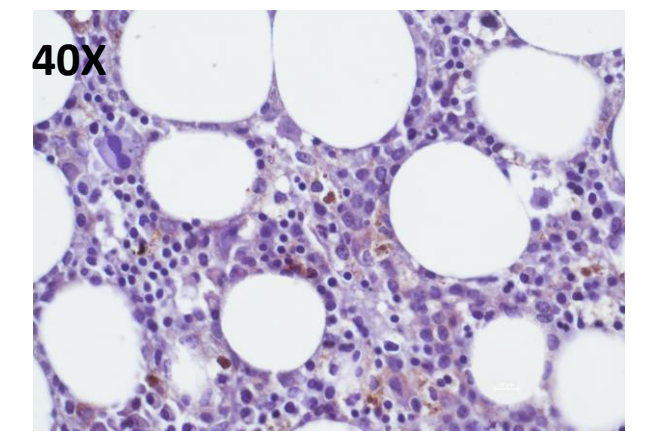

**IPSS-R Intermediate**

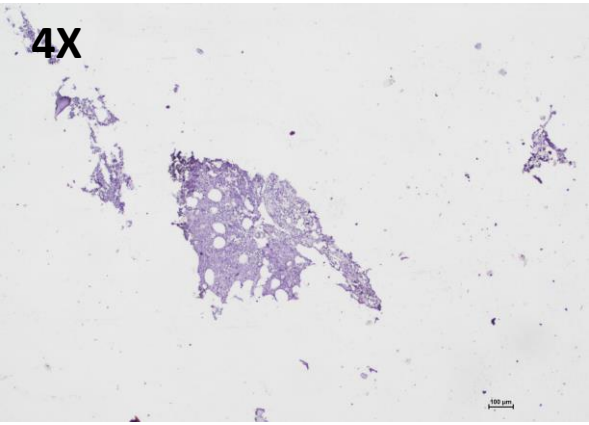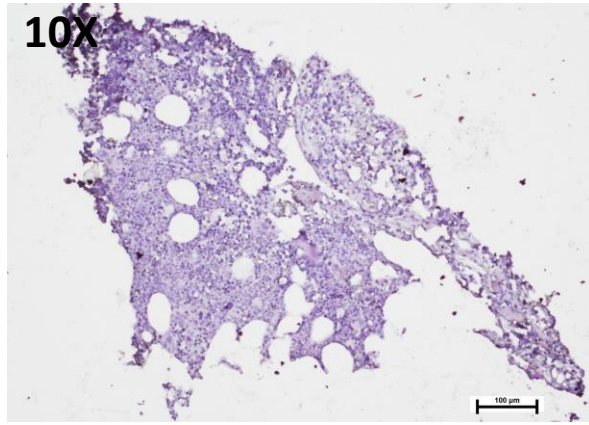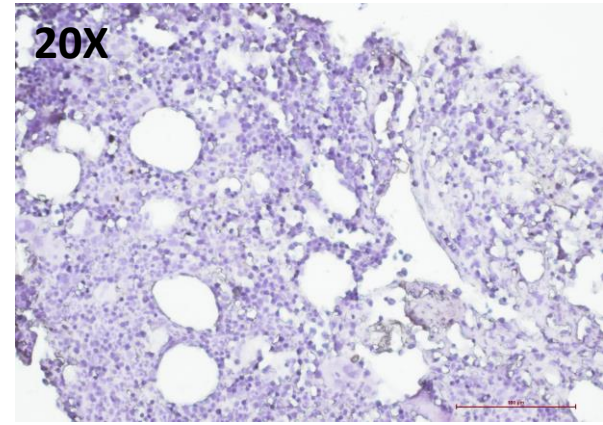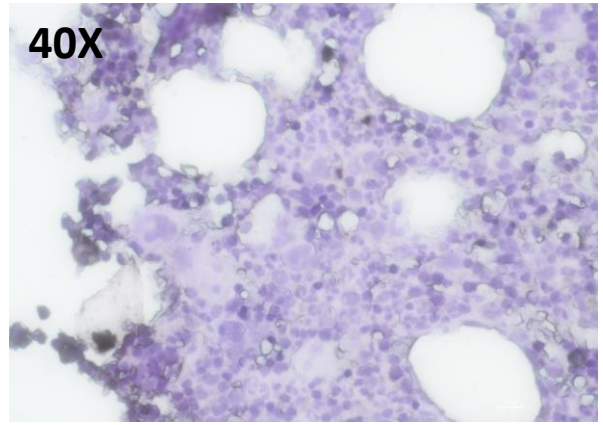

**IPSS-R Intermediate**

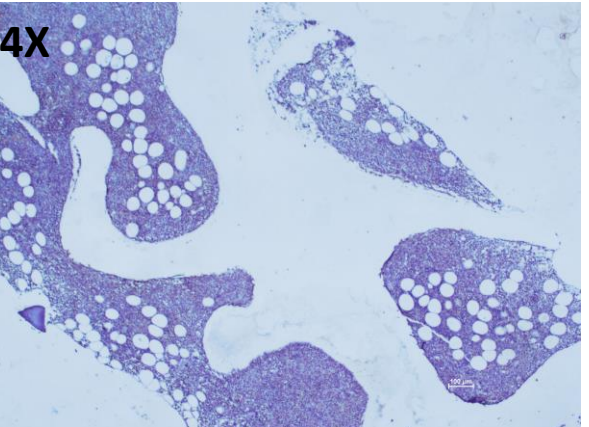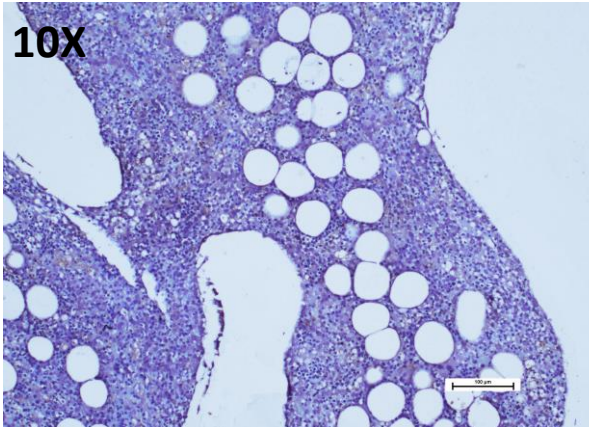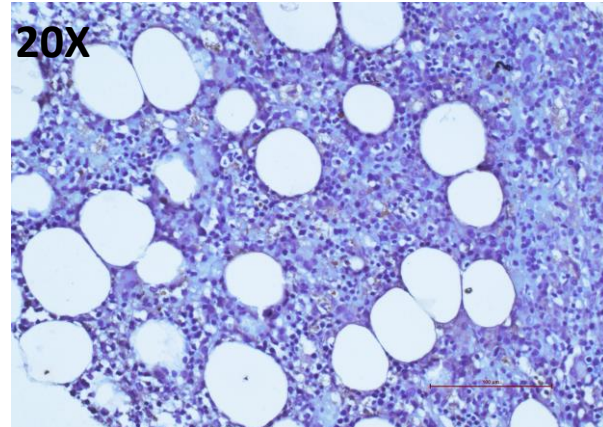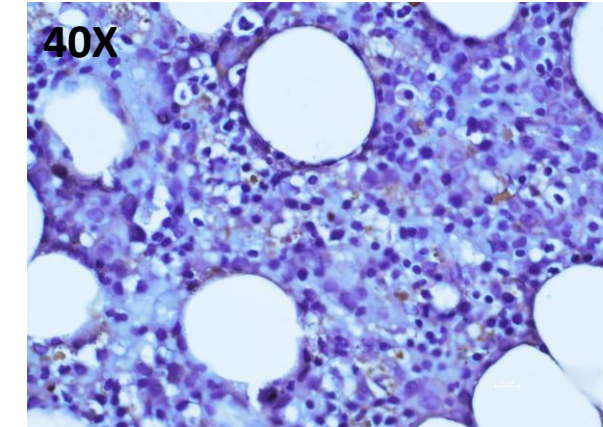

# IPSS-R Intermediate

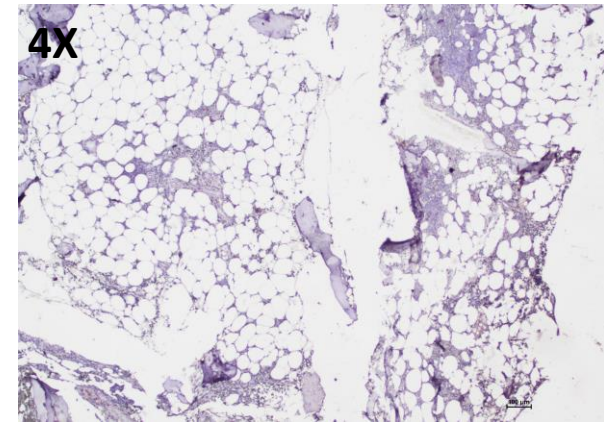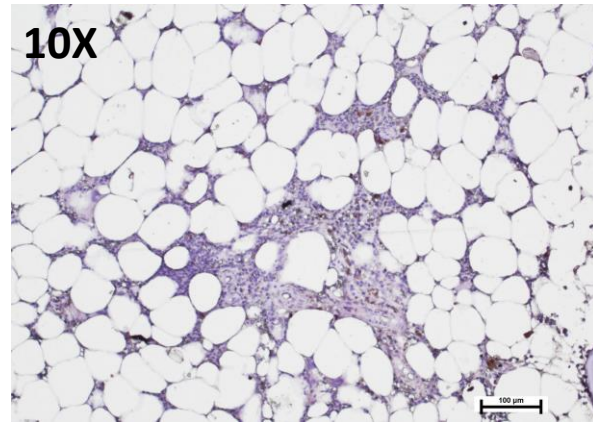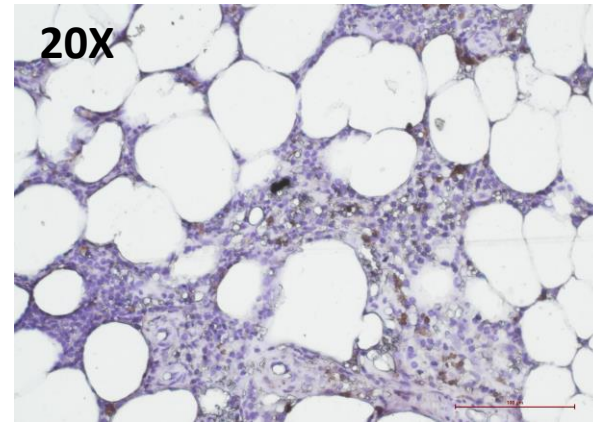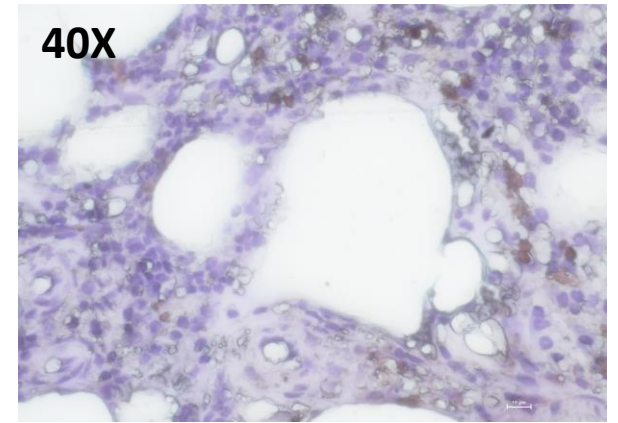

# IPSS-R High

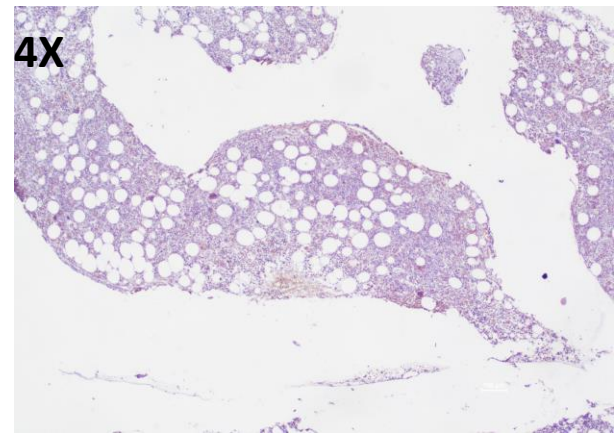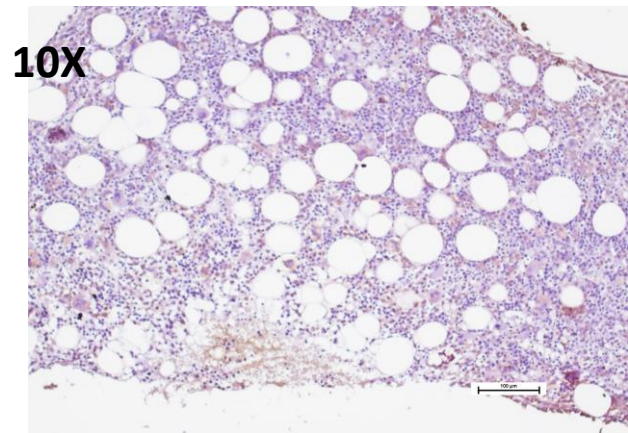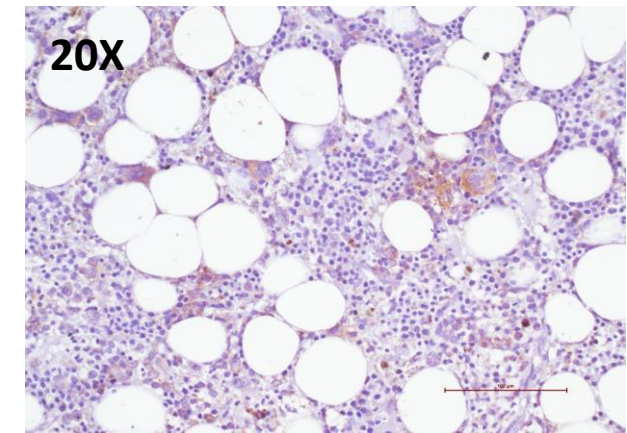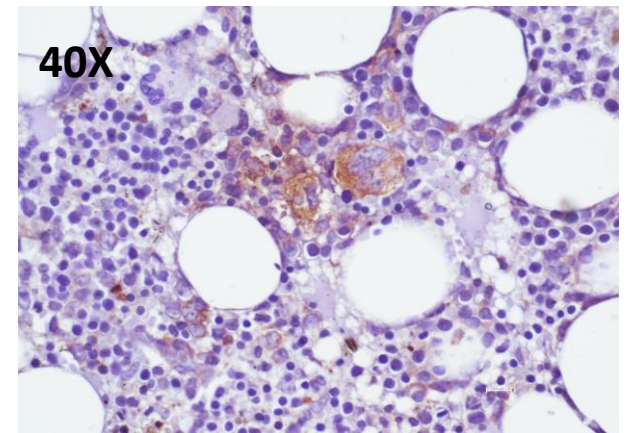

# IPSS-R Very High

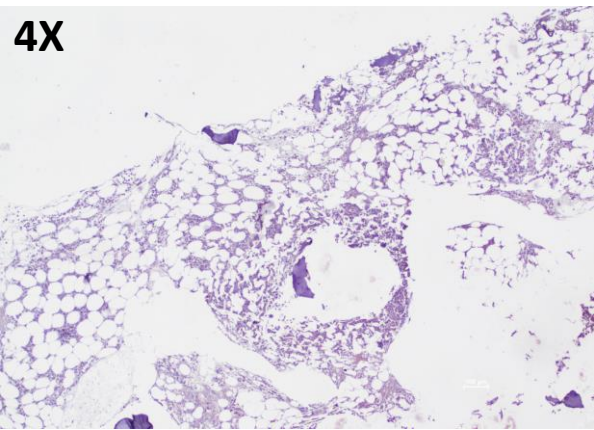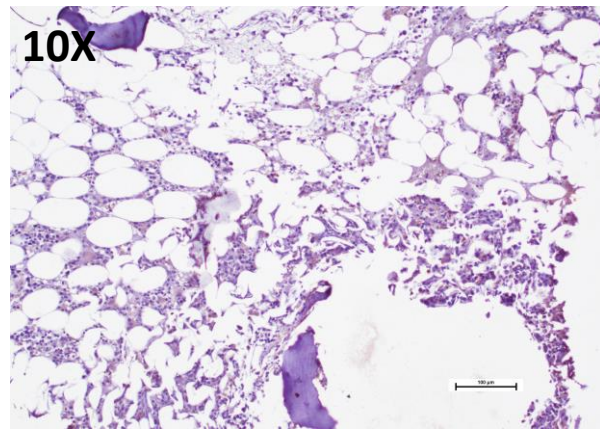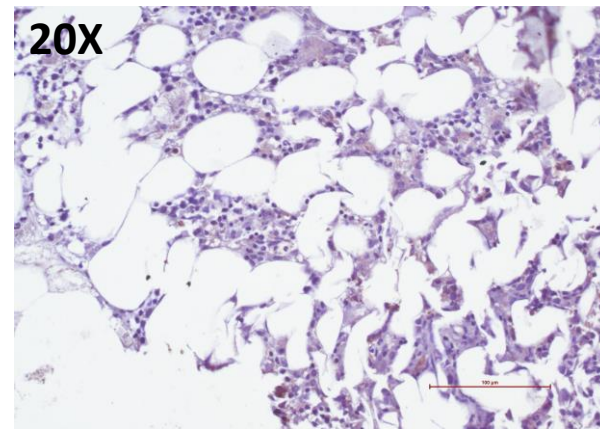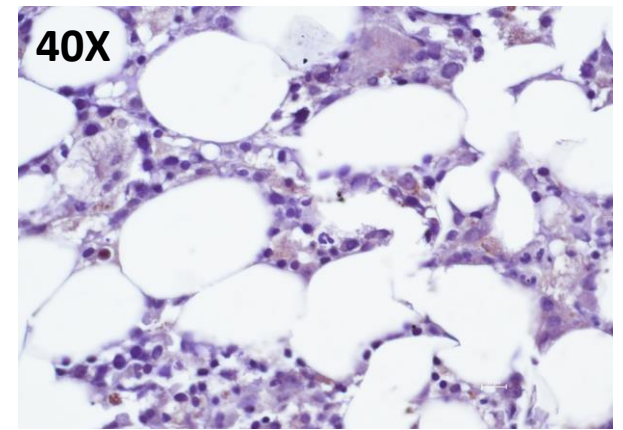

# AML-MRC

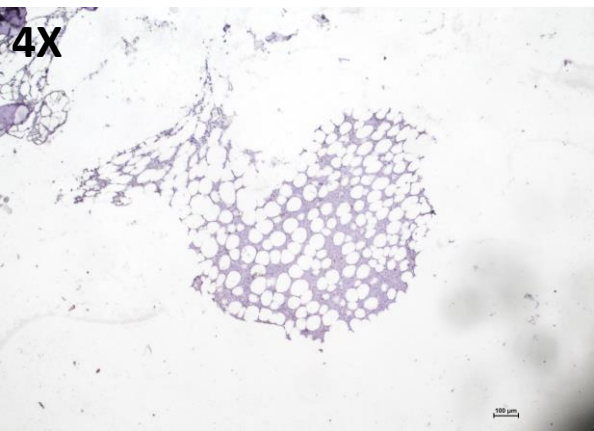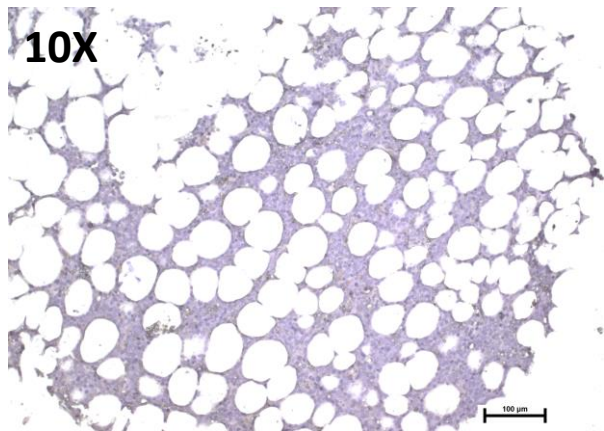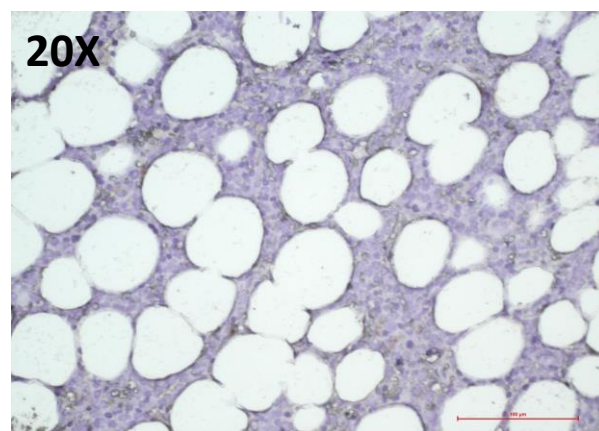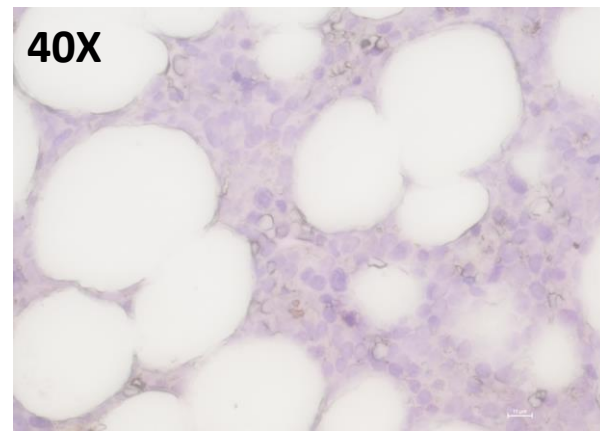

# AML-MRC

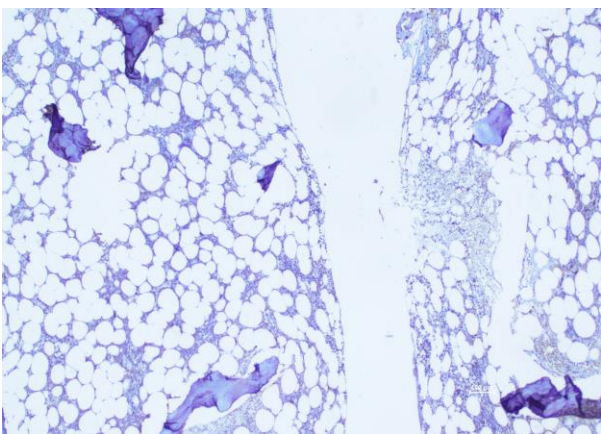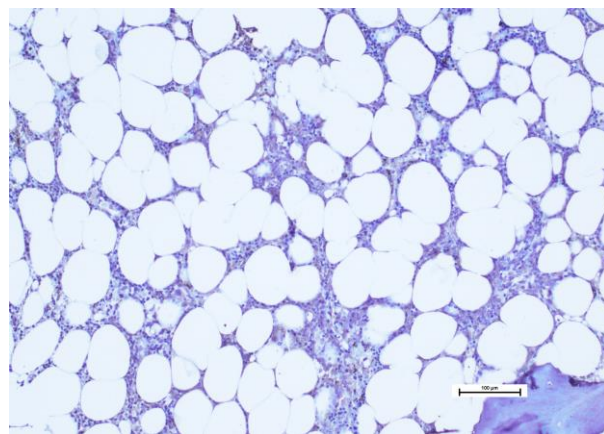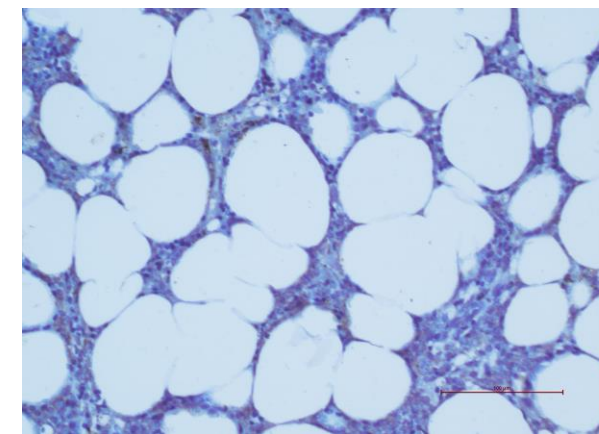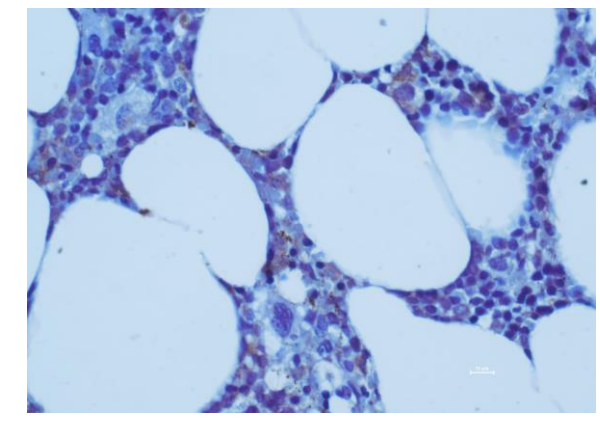

## Supplementary Tables:

### Alterations of the expression of *TET2* and DNA 5-hmC predict poor prognosis in Myelodysplastic Neoplasms: An observational study from India

Supplementary Table 1: List of primers used in this study

| Gene                | Primer                        | Annealing Temperature | Purpose                   |
|---------------------|-------------------------------|-----------------------|---------------------------|
| <i>TET1</i>         | F: ACCTGCAGCTGTCTTGATCG       | 60°C                  | qPCR                      |
|                     | R: CACCCATGAGAGCTTTCCCT       |                       |                           |
| <i>TET2</i>         | F: AGGACTGAGCTGCTGAATTC       | 60°C                  | qPCR                      |
|                     | R: GGGCTTCCATTCTGGAGCTT       |                       |                           |
| <i>GAPDH</i>        | F: ACGGATTTGGTCGTATTGGG       | 60°C                  | qPCR                      |
|                     | R: CGCTCCTGGAAGATGGTGAT       |                       |                           |
| <i>TET2-Exon 11</i> | F: AATGGAAACCTATCAGTGGACAAC   | 60°C                  | PCR for Sanger sequencing |
|                     | R: TATATATCTGTTGTAAGGCCCTGTGA |                       |                           |
| <i>TET2-Exon 11</i> | F: AATGGAAACCTATCAGTGGACAAC   | 60°C                  | Sanger sequencing         |
| <i>TET2-Exon 11</i> | R: TATATATCTGTTGTAAGGCCCTGTGA | 60°C                  | Sanger sequencing         |



Supplementary Table 2: Pathogenic variants of TET2 in patient samples

| Sample                                                                                               | Start: chr4     | Ref          | Alt           | Type           | Change: NM_001127208:             |      |                    |                |
|------------------------------------------------------------------------------------------------------|-----------------|--------------|---------------|----------------|-----------------------------------|------|--------------------|----------------|
| <b>A2</b>                                                                                            | 105234042       | C            | T             | SNV            | exon3:c.C100T:p.L34F              |      |                    |                |
|                                                                                                      | 105275570       | AG           | -             | frameshift del | exon11:c.5060_5061del:p.Q1687fsX3 |      |                    |                |
|                                                                                                      | 105275843       | A            | G             | SNV            | exon11:c.A5333G:p.H1778R          |      |                    |                |
|                                                                                                      | 105276132       | GT           | -             | frameshift del | exon11:c.5622_5623del:p.E1874fsX2 |      |                    |                |
| <b>A3</b>                                                                                            | 105235006       | G            | A             | SNV            | exon3:c.G1064A:p.G355D            |      |                    |                |
| <b>V2</b>                                                                                            | 105234028       | C            | G             | SNV            | exon3:c.C86G:p.P29R               |      |                    |                |
| <b>H3</b>                                                                                            | 105276348       | -            | A             | frameshift ins | exon11:c.5839dupA:p.G1946fsX2     |      |                    |                |
| <b>I1</b>                                                                                            | 105275843       | A            | G             | SNV            | exon11:c.A5333G:p.H1778R          |      |                    |                |
| <b>I3</b>                                                                                            | 105234028       | C            | G             | SNV            | exon3:c.C86G:p.P29R               |      |                    |                |
| <b>L1</b>                                                                                            | 105234028       | C            | G             | SNV            | exon3:c.C86G:p.P29R               |      |                    |                |
| <i>Continued...</i>                                                                                  |                 |              |               |                |                                   |      |                    |                |
| Sample                                                                                               | AA Change       | ExAC_<br>All | 1000g_<br>All | gnomAD_All     |                                   | SIFT | Polyphen2<br>_HDIV | CADD_<br>phred |
|                                                                                                      |                 |              |               | Exome          | Genome                            |      |                    |                |
| <b>A2</b>                                                                                            | p.L34F          | 0.02         | 0.01          | 0.02           | 0.01                              | D    | B                  | 23             |
|                                                                                                      | p.Q1687fsX<br>3 | .            | .             | .              | .                                 | .    | .                  | .              |
|                                                                                                      | p.H1778R        | 0.05         | 0.08          | .              | .                                 | D    | D                  | 23.5           |
|                                                                                                      | p.E1874fsX2     | .            | .             | .              | .                                 | .    | .                  | .              |
| <b>A3</b>                                                                                            | p.G355D         | 0.03         | 0.02          | 0.03           | 0.03                              | D    | P                  | 24.9           |
| <b>V2</b>                                                                                            | p.P29R          | 0.06         | 0.09          | 0.06           | 0.04                              | T    | D                  | 24.2           |
| <b>H3</b>                                                                                            | p.G1946fsX<br>3 | .            | .             | .              | .                                 | .    | .                  | .              |
| <b>I1</b>                                                                                            | p.H1778R        | 0.05         | 0.08          | .              | .                                 | D    | D                  | 23.5           |
| <b>I3</b>                                                                                            | p.P29R          | 0.06         | 0.09          | 0.06           | 0.04                              | T    | D                  | 24.2           |
| <b>L1</b>                                                                                            | p.P29R          | 0.06         | 0.09          | .              | .                                 | T    | D                  | 24.2           |
| <i>Legend: A: AML-MR, V: IPSS-R very high, H: IPSS-R high, I: IPSS-R intermediate, L: IPSS-R low</i> |                 |              |               |                |                                   |      |                    |                |
